# Supplementary material for: Electroencephalogram-Based Single-Trial Detection of Language Expectation Violations in Listening to Speech
Source: Front Comput Neurosci. 2019 Mar 29;13:15. doi: 10.3389/fncom.2019.00015 (PMC6449452; doi:10.3389/fncom.2019.00015)
Supplement: Supplementary file 1 [file Table_1.XLSX]

## Sheet: 音声収録用
No.	1	2	3	Category
1	太郎が	旅行に	出かけた	Sem-Cor
2	花子が	日記を	綴った
3	さとるが	ノートを	重ねた
4	しげるが	ラジオを	壊した
5	太郎が	名刺を	携帯している
6	さとしが	枝豆を	食べた
7	かずみが	粘土を	こねた
8	しょうたが	お米を	炊いた
9	先生が	子供を	たしなめる
10	太郎が	テレビを	購入した
11	花子が	布を	かぶせている
12	さとるが	扉を	叩いた
13	父が	土台を	固めた
14	友達が	決心を	固めた
15	まことが	ゴミを	散らかした
16	なおみが	紙飛行機を	飛ばした
17	母が	娘を	だいた
18	娘が	チョコレートを	溶かした
19	たけしが	英語を	きいた
20	生徒が	旅行を	計画している
21	ゆうやが	石ころを	蹴った
22	あゆみが	服を	畳んだ
23	けんたが	画用紙を	切った
24	ようこが	ボートを	漕いだ
25	こうじが	少女を	助けた
26	ゆうたが	魚を	釣った
27	さとしが	名前を	記入している
28	ゆうきが	荷物を	担いでいる
29	優子が	進路を	決めた
30	車が	トンネルを	くぐった
31	かずやが	ひもを	くくっている
32	ゆかが	電気を	消した
33	こうへいが	勧誘を	断った
34	まさひろが	辞書を	取りだした
35	直人が	お金を	隠した
36	とおるが	お金を	稼いだ
37	ゆうたが	部屋を	貸した
38	さとしが	夢を	叶えた
39	太郎が	植木鉢を	倒した
40	ひろしが	ホテルに	泊まった
41	太郎が	辞書に	出かけた	Sem-Inc
42	花子が	ビールを	綴った
43	さとるが	海水を	重ねた
44	しげるが	騒音を	壊した
45	太郎が	掃除を	携帯している
46	さとしが	ビールを	食べた
47	かずみが	安心を	こねた
48	しょうたが	将棋を	炊いた
49	先生が	改札を	たしなめる
50	太郎が	病気を	購入した
51	花子が	アフリカを	かぶせている
52	さとるが	空気を	叩いた
53	父が	水泳を	固めた
54	友達が	座席を	強めた
55	まことが	天気を	散らかした
56	なおみが	安全を	飛ばした
57	母が	返事を	抱いた
58	娘が	健康を	溶かした
59	たけしが	背中を	きいた
60	生徒が	醤油を	計画している
61	ゆうやが	二酸化炭素を	蹴った
62	あゆみが	蛍光灯を	畳んだ
63	けんたが	旅行を	切った
64	ようこが	パンを	漕いだ
65	こうじが	木箱を	助けた
66	ゆうたが	星空を	釣った
67	さとしが	酸素を	記入している
68	ゆうきが	空腹を	担いでいる
69	優子が	花粉症を	決めた
70	車が	経営を	くぐった
71	かずやが	喜びを	くくっている
72	ゆかが	運転を	消した
73	こうへいが	海辺を	断った
74	まさひろが	全国を	取りだした
75	直人が	夕方を	隠した
76	とおるが	青空を	稼いだ
77	ゆうたが	まなざしを	貸した
78	さとしが	マイクを	叶えた
79	太郎が	まぶたを	倒した
80	ひろしが	コーヒーに	泊まった
81	学生が	建築家を	助けた	Syn-Cor
82	鳥が	空を	飛んだ
83	太郎が	コーヒーを	飲んでいる
84	みのるが	みかんを	食べた
85	しげるが	スープを	飲んだ
86	きよしが	お店を	始めた
87	たけしが	山を	見上げた
88	かずこが	ボールを	投げた
89	さちこが	鳥を	つかまえた
90	ようこが	お茶を	飲んだ
91	先生が	風邪を	ひいた
92	街灯が	街を	照らした
93	外国人が	東京を	観光した
94	さとるが	パソコンを	はこんだ
95	ただしが	漫画を	読んだ
96	りょうたが	ひざを	曲げた
97	太郎が	時計を	見た
98	メダリストが	涙を	流した
99	あおいが	ウサギを	つかまえた
100	飼い主が	ペットを	にがした
101	たかこが	紙を	やぶいた
102	かずやが	贈り物を	つつんだ
103	学生が	単位を	落とした
104	鳥が	巣を	作った
105	学生が	勉強を	始めた
106	ゆいが	カレーを	食べた
107	そうすけが	音楽を	流した
108	少年が	感謝状を	もらった
109	料理長が	包丁を	といだ
110	花子が	物語を	読んだ
111	よしみが	食事を	作った
112	まことが	ドアを	あけた
113	まもるが	ノートを	ひらいた
114	しげるが	写真を	とった
115	軍隊が	国境を	守った
116	教師が	生徒を	はげました
117	少年が	試合を	制した
118	はやとが	水を	飲んでいる
119	のぞみが	友達を	けった
120	かずこが	手紙を	書いた
121	学生が	建築家が	助けた	Syn-Inc
122	鳥が	空が	飛んだ
123	太郎が	コーヒーが	飲んでいる
124	みのるが	みかんが	食べた
125	しげるが	スープが	飲んだ
126	きよしが	お店が	始めた
127	たけしが	山が	見上げた
128	かずこが	ボールが	投げた
129	さちこが	鳥が	つかまえた
130	ようこが	お茶が	飲んだ
131	先生が	風邪が	ひいた
132	街灯が	街が	照らした
133	外国人が	東京が	観光した
134	さとるが	パソコンが	はこんだ
135	ただしが	漫画が	読んだ
136	りょうたが	ひざが	曲げた
137	太郎が	時計が	見た
138	メダリストが	涙が	流した
139	あおいが	ウサギが	つかまえた
140	飼い主が	ペットが	にがした
141	たかこが	紙が	やぶいた
142	かずやが	贈り物が	つつんだ
143	学生が	単位が	落とした
144	鳥が	巣が	作った
145	学生が	勉強が	始めた
146	ゆいが	カレーが	食べた
147	そうすけが	音楽が	流した
148	少年が	感謝状が	もらった
149	料理長が	包丁が	といだ
150	花子が	物語が	読んだ
151	よしみが	食事が	作った
152	まことが	ドアが	あけた
153	まもるが	ノートが	ひらいた
154	しげるが	写真が	とった
155	軍隊が	国境が	守った
156	教師が	生徒が	はげました
157	少年が	試合が	制した
158	はやとが	水が	飲んでいる
159	のぞみが	友達が	けった
160	かずこが	手紙が	書いた
161	太郎が	池で	休んだ	Fil
162	明後日は	彼女の	誕生日だ
163	ひろゆきは	歌が	好きだ
164	お茶は	今日も	おいしい
165	みさきは	映画を	見た
166	太郎が	メンバーを	集めた
167	山の景色は	いつも	きれいだ
168	けんじが	意見を	丸める
169	かなは	駅まで	散歩する
170	ゆうやは	いつも	幸せそうだ
171	子どもは	サッカーに	夢中だ
172	昨日は	怖い夢を	見た
173	その映画は	多くの人に	愛されている
174	遠足が	雨で	延期になった
175	パソコンが	突然	動かなくなった
176	木の枝が	落ちて	折れた
177	猿が	崖を	登っている
178	彼女は	ご飯を	混ぜた
179	時計の	針が	進んでいる
180	けんじの	腕時計は	高級だ
181	ただしは	カレンダーを	めくった
182	くみは	野菜を	ゆでた
183	桜が	綺麗に	咲いている
184	さとしは	髪の毛を	染めた
185	紅茶を	マグカップに	注いだ
186	学生が	数学の本を	読んだ
187	サラリーマンが	予定を	変更した
188	学生が	樹木を	植えた
189	床に	消しゴムを	落とした
190	けんじは	スープを	温めた
191	あのテレビ番組は	深夜に	放送されている
192	劇は	悲しい結末を	迎えた
193	彼女は	部屋で	整理整頓をした
194	机の上に	マグカップを	置いた
195	友達が	隣の街に	引っ越した
196	かなこに	プレゼントを	もらった
197	彼女と	電車の中で	話した
198	犬が	男性に	吠えている
199	猫が	こたつの中で	寝ている
200	友達が	宝くじを	当てた
